# Supplementary material
Source: ML conference proceedings conference paper supplement (https://proceedings.mlr.press/v119/jin20c.html)
Supplement: Supplementary file [file jin20c-supp.pdf]

## A. Omitted Details for the Algorithm

In this section, we provide omitted details on how to implement our algorithm efficiently.

### A.1. Updating Occupancy Measure

This subsection explains how to implement the update defined in Eq. (7) efficiently. We use almost the same approach as in (Rosenberg & Mansour, 2019a) with the only difference being the choice of confidence set. We provide details of the modification here for completeness. It has been shown in (Rosenberg & Mansour, 2019a) that Eq. (7) can be decomposed into two steps: (1) compute  $\tilde{q}_{t+1}(x, a, x') = \hat{q}_t(x, a, x') \exp\{-\eta \hat{\ell}_t(x, a)\}$  for any  $(x, a, x')$ , which is the optimal solution of the unconstrained problem; (2) compute the projection step:

$$\hat{q}_{t+1} = \operatorname{argmin}_{q \in \Delta(\mathcal{P}_i)} D(q \parallel \tilde{q}_{t+1}), \quad (11)$$

Since our choice of confidence set  $\Delta(\mathcal{P}_i)$  is different, the main change lies in the second step, whose constraint set can be written explicitly using the following set of linear equations:

$$\begin{aligned} \forall k : & \sum_{x \in X_k, a \in A, x' \in X_{k+1}} q(x, a, x') = 1, \\ \forall k, \forall x \in X_k : & \sum_{a \in A, x' \in X_{k+1}} q(x, a, x') = \sum_{x' \in X_{k-1}, a \in A} q(x', a, x), \\ \forall k, \forall (x, a, x') \in X_k \times A \times X_{k+1} : & q(x, a, x') \leq [\bar{P}_i(x'|x, a) + \epsilon_i(x'|x, a)] \sum_{y \in X_{k+1}} q(x, a, y), \\ & q(x, a, x') \geq [\bar{P}_i(x'|x, a) - \epsilon_i(x'|x, a)] \sum_{y \in X_{k+1}} q(x, a, y), \\ & q(x, a, x') \geq 0. \end{aligned} \quad (12)$$

Therefore, the projection step Eq. (11) is a convex optimization problem with linear constraints, which can be solved in polynomial time. This optimization problem can be further reformulated into a dual problem, which is a convex optimization problem with only non-negativity constraints, and thus can be solved more efficiently.

**Lemma 7.** *The dual problem of Eq.(11) is to solve*

$$\mu_t, \beta_t = \operatorname{argmin}_{\mu, \beta \geq 0} \sum_{k=0}^{L-1} \ln Z_t^k(\mu, \beta)$$

where  $\beta := \{\beta(x)\}_x$  and  $\mu := \{\mu^+(x, a, x'), \mu^-(x, a, x')\}_{(x, a, x')}$  are dual variables and

$$\begin{aligned} Z_t^k(\mu, \beta) &= \sum_{x \in X_k, a \in A, x' \in X_{k+1}} \hat{q}_t(x, a, x') \exp\{B_t^{\mu, \beta}(x, a, x')\}, \\ B_t^{\mu, \beta}(x, a, x') &= \beta(x') - \beta(x) + (\mu^- - \mu^+)(x, a, x') - \eta \hat{\ell}_t(x, a) \\ &+ \sum_{y \in X_{k(x)+1}} (\mu^+ - \mu^-)(x, a, y) \bar{P}_i(y|x, a) + (\mu^+ + \mu^-)(x, a, y) \epsilon_i(y|x, a). \end{aligned}$$

Furthermore, the optimal solution to Eq.(11) is given by

$$\hat{q}_{t+1}(x, a, x') = \frac{\hat{q}_t(x, a, x')}{Z_t^{k(x)}(\mu_t, \beta_t)} \exp\{B_t^{\mu_t, \beta_t}(x, a, x')\}.$$

*Proof.* In the following proof, we omit the non-negativity constraint Eq. (12). This is without loss of generality, since the optimal solution for the modified version of Eq.(11) without the non-negativity constraint Eq. (12) turns out to always satisfy the non-negativity constraint.

We write the Lagrangian as:

$$\begin{aligned}
 \mathcal{L}(q, \lambda, \beta, \mu) = & D(q || \tilde{q}_{t+1}) + \sum_{k=0}^{L-1} \lambda_k \left( \sum_{x \in X_k, a \in A, x' \in X_{k+1}} q(x, a, x') - 1 \right) \\
 & + \sum_{k=1}^{L-1} \sum_{x \in X_k} \beta(x) \left( \sum_{a \in A, x' \in X_{k+1}} q(x, a, x') - \sum_{x' \in X_{k-1}, a \in A} q(x', a, x) \right) \\
 & + \sum_{k=0}^{L-1} \sum_{x \in X_k, a \in A, x' \in X_{k+1}} \mu^+(x, a, x') \left( q(x, a, x') - [\bar{P}_i(x'|x, a) + \epsilon_i(x'|x, a)] \sum_{y \in X_{k+1}} q(x, a, y) \right) \\
 & + \sum_{k=0}^{L-1} \sum_{x \in X_k, a \in A, x' \in X_{k+1}} \mu^-(x, a, x') \left( [\bar{P}_i(x'|x, a) - \epsilon_i(x'|x, a)] \sum_{y \in X_{k+1}} q(x, a, y) - q(x, a, x') \right)
 \end{aligned}$$

where  $\lambda := \{\lambda_k\}_k$ ,  $\beta := \{\beta(x)\}_x$  and  $\mu := \{\mu^+(x, a, x'), \mu^-(x, a, x')\}_{(x, a, x')}$  are Lagrange multipliers. We also define  $\beta(x_0) = \beta(x_L) = 0$  for convenience. Now taking the derivative we have

$$\begin{aligned}
 \frac{\partial \mathcal{L}}{\partial q(x, a, x')} = & \ln q(x, a, x') - \ln \tilde{q}_{t+1}(x, a, x') + \lambda_{k(x)} + \beta(x) - \beta(x') + (\mu^+ - \mu^-)(x, a, x') \\
 & - \sum_{y \in X_{k(x)+1}} (\mu^+ - \mu^-)(x, a, y) \bar{P}_i(y|x, a) + (\mu^+ + \mu^-)(x, a, y) \epsilon_i(y|x, a) \\
 = & \ln q(x, a, x') - \ln \tilde{q}_{t+1}(x, a, x') + \lambda_{k(x)} - \widehat{\eta}_t(x, a) - B_t^{\mu, \beta}(x, a, x').
 \end{aligned}$$

Setting the derivative to zero gives the explicit form of the optimal  $q^*$  by

$$\begin{aligned}
 q^*(x, a, x') = & \tilde{q}_{t+1}(x, a, x') \exp \left\{ -\lambda_{k(x)} + \widehat{\eta}_t(x, a) + B_t^{\mu, \beta}(x, a, x') \right\} \\
 = & \widehat{q}_t(x, a, x') \exp \left\{ -\lambda_{k(x)} + B_t^{\mu, \beta}(x, a, x') \right\}.
 \end{aligned}$$

On the other hand, setting  $\partial \mathcal{L} / \partial \lambda_k = 0$  shows that the optimal  $\lambda^*$  satisfies

$$\exp \{\lambda_k^*\} = \sum_{x \in X_k, a \in A, x' \in X_{k+1}} \widehat{q}_t(x, a, x') \exp \left\{ B_t^{\mu, \beta}(x, a, x') \right\} = Z_t^k(\mu, \beta).$$

It is straightforward to check that strong duality holds, and thus the optimal dual variables  $\mu^*, \beta^*$  are given by

$$\mu^*, \beta^* = \operatorname{argmax}_{\mu, \beta \geq 0} \max_{\lambda} \min_q \mathcal{L}(q, \lambda, \beta, \mu) = \operatorname{argmax}_{\mu, \beta \geq 0} \mathcal{L}(q^*, \lambda^*, \beta, \mu).$$

Finally, we note the equality

$$\begin{aligned}
 \mathcal{L}(q, \lambda, \beta, \mu) = & D(q || \tilde{q}_{t+1}) + \sum_{k=0}^{L-1} \sum_{x \in X_k, a \in A, x' \in X_{k+1}} \left( \frac{\partial \mathcal{L}}{\partial q(x, a, x')} - \ln q(x, a, x') + \ln \tilde{q}_{t+1}(x, a, x') \right) q(x, a, x') - \sum_{k=1}^{L-1} \lambda_k \\
 = & \sum_{k=0}^{L-1} \sum_{x \in X_k, a \in A, x' \in X_{k+1}} \left[ \left( \frac{\partial \mathcal{L}}{\partial q(x, a, x')} - 1 \right) q(x, a, x') + \tilde{q}_{t+1}(x, a, x') \right] - \sum_{k=1}^{L-1} \lambda_k.
 \end{aligned}$$

This, combined with the fact that  $q^*$  has zero partial derivative, gives

$$\mathcal{L}(q^*, \lambda^*, \beta, \mu) = -L + \sum_{k=0}^{L-1} \sum_{x \in X_k, a \in A, x' \in X_{k+1}} \tilde{q}_{t+1}(x, a, x') - \sum_{k=0}^{L-1} \ln Z_t^k(\mu, \beta).$$

Note that the first two terms in the last expression are independent of  $(\mu, \beta)$ . We thus have:

$$\mu^*, \beta^* = \operatorname{argmax}_{\mu, \beta \geq 0} \mathcal{L}(q^*, \lambda^*, \beta, \mu) = \operatorname{argmin}_{\mu, \beta \geq 0} \sum_{k=0}^{L-1} \ln Z_t^k(\mu, \beta).$$

Combining all equations for  $(q^*, \lambda^*, \mu^*, \beta^*)$  finishes the proof.  $\square$

## A.2. Computing Upper Occupancy Bounds

This subsection explains how to greedily solve the following optimization problem from Eq. (10):

$$\max_{\hat{P}(\cdot|\tilde{x}, a)} \sum_{x' \in X_{k(\tilde{x})+1}} \hat{P}(x'|\tilde{x}, a) f(x')$$

subject to  $\hat{P}(\cdot|\tilde{x}, a)$  being a valid distribution over  $X_{k(\tilde{x})+1}$  and for all  $x' \in X_{k(\tilde{x})+1}$ ,

$$\left| \hat{P}(x'|\tilde{x}, a) - \bar{P}_i(x'|\tilde{x}, a) \right| \leq \epsilon_i(x'|\tilde{x}, a),$$

where  $(\tilde{x}, a)$  is some fixed state-action pair,  $\epsilon_i(x'|\tilde{x}, a)$  is defined in Eq. (6), and the value of  $f(x')$  for any  $x' \in X_{k(\tilde{x})+1}$  is known. To simplify notation, let  $n = |X_{k(\tilde{x})+1}|$ , and  $\sigma : [n] \rightarrow X_{k(\tilde{x})+1}$  be a bijection such that

$$f(\sigma(1)) \leq f(\sigma(2)) \leq \dots \leq f(\sigma(n)).$$

Further let  $\bar{p}$  and  $\epsilon$  be shorthands of  $\bar{P}_i(\cdot|\tilde{x}, a)$  and  $\epsilon_i(\cdot|\tilde{x}, a)$  respectively. With these notations, the problem becomes

$$\max_{\substack{p \in \mathbb{R}_+^n: \sum_{x'} p(x')=1 \\ |p(x') - \bar{p}(x')| \leq \epsilon(x')}} \sum_{j=1}^n p(\sigma(j)) f(\sigma(j)).$$

Clearly, the maximum is achieved by redistributing the distribution  $\bar{p}$  so that it puts as much weight as possible on states with large  $f$  value under the constraint. This can be implemented efficiently by maintaining two pointers  $j^-$  and  $j^+$  starting from 1 and  $n$  respectively, and considering moving as much weight as possible from state  $x^- = \sigma(j^-)$  to state  $x^+ = \sigma(j^+)$ . More specifically, the maximum possible weight change for  $x^-$  and  $x^+$  are  $\delta^- = \min\{\bar{p}(x^-), \epsilon(x^-)\}$  and  $\delta^+ = \min\{1 - \bar{p}(x^+), \epsilon(x^+)\}$  respectively, and thus we move  $\min\{\delta^-, \delta^+\}$  amount of weight from  $x^-$  to  $x^+$ . In the case where  $\delta^- \leq \delta^+$ , no more weight can be decreased from  $x^-$  and we increase the pointer  $j^-$  by 1 as well as decreasing  $\epsilon(x^-)$  by  $\delta^-$  to reflect the change in maximum possible weight increase for  $x^+$ . The situation for the case  $\delta^- > \delta^+$  is similar. The procedure stops when the two pointers coincide. See Algorithm 4 for the complete pseudocode.

We point out that the step of sorting the values of  $f$  and finding  $\sigma$  can in fact be done only once for each layer (instead of every call of Algorithm 4). For simplicity, we omit this refinement.

## B. Omitted Details for the Analysis

In this section, we provide omitted proofs for the regret analysis of our algorithm.

### B.1. Auxiliary Lemmas

First, we prove Lemma 2 which states that with probability at least  $1 - 4\delta$ , the true transition function  $P$  is within the confidence set  $\mathcal{P}_i$  for all epoch  $i$ .

*Proof of Lemma 2.* By the empirical Bernstein inequality (Maurer & Pontil, 2009, Theorem 4) and union bounds, we have with probability at least  $1 - 4\delta$ , for all  $(x, a, x') \in X_k \times A \times X_{k+1}$ ,  $k = 0, \dots, L-1$ , and any  $i \leq T$ ,

$$|P(x'|x, a) - \bar{P}_i(x'|x, a)| \leq \sqrt{\frac{2\bar{P}_i(x'|x, a)(1 - \bar{P}_i(x'|x, a)) \ln\left(\frac{T|X|^2|A|}{\delta}\right)}{\max\{1, N_i(x, a) - 1\}}} + \frac{7 \ln\left(\frac{T|X|^2|A|}{\delta}\right)}{3 \max\{1, N_i(x, a) - 1\}}$$

**Algorithm 4** GREEDY

**Input:**  $f : X \rightarrow [0, 1]$ , a distribution  $\bar{p}$  over  $n$  states of layer  $k$ , positive numbers  $\{\epsilon(x)\}_{x \in X_k}$   
**Initialize:**  $j^- = 1, j^+ = n$ , sort  $\{f(x)\}_{x \in X_k}$  and find  $\sigma$  such that  $f(\sigma(1)) \leq f(\sigma(2)) \leq \dots \leq f(\sigma(n))$

**while**  $j^- < j^+$  **do**

$x^- = \sigma(j^-), x^+ = \sigma(j^+)$

$\delta^- = \min\{\bar{p}(x^-), \epsilon(x^-)\}$   $\triangleright$  maximum weight to decrease for state  $x^-$

$\delta^+ = \min\{1 - \bar{p}(x^+), \epsilon(x^+)\}$   $\triangleright$  maximum weight to increase for state  $x^+$

$\bar{p}(x^-) \leftarrow \bar{p}(x^-) - \min\{\delta^-, \delta^+\}$

$\bar{p}(x^+) \leftarrow \bar{p}(x^+) + \min\{\delta^-, \delta^+\}$

**if**  $\delta^- \leq \delta^+$  **then**

$\epsilon(x^+) \leftarrow \epsilon(x^+) - \delta^-$

$j^- \leftarrow j^- + 1$

**else**

$\epsilon(x^-) \leftarrow \epsilon(x^-) - \delta^+$

$j^+ \leftarrow j^+ - 1$

**end if**

**end while**

**Return:**  $\sum_{j=1}^n \bar{p}(\sigma(j))f(\sigma(j))$

$$\leq 2\sqrt{\frac{\bar{P}_i(x'|x, a) \ln\left(\frac{T|X||A|}{\delta}\right)}{\max\{1, N_i(x, a) - 1\}}} + \frac{14 \ln\left(\frac{T|X||A|}{\delta}\right)}{3 \max\{1, N_i(x, a) - 1\}} = \epsilon_i(x'|x, a)$$

which finishes the proof. □

Next, we state three lemmas that are useful for the rest of the proof. The first one shows a convenient bound on the difference between the true transition function and any transition function from the confidence set.

**Lemma 8.** *Under the event of Lemma 2, for all epoch  $i$ , all  $\hat{P} \in \mathcal{P}_i$ , all  $k = 0, \dots, L - 1$  and  $(x, a, x') \in X_k \times A \times X_{k+1}$ , we have*

$$\left| \hat{P}(x'|x, a) - P(x'|x, a) \right| = \mathcal{O} \left( \sqrt{\frac{P(x'|x, a) \ln\left(\frac{T|X||A|}{\delta}\right)}{\max\{1, N_i(x, a)\}}} + \frac{\ln\left(\frac{T|X||A|}{\delta}\right)}{\max\{1, N_i(x, a)\}} \right) \triangleq \epsilon_i^*(x'|x, a).$$

*Proof.* Under the event of Lemma 2, we have

$$\bar{P}_i(x'|x, a) \leq P(x'|x, a) + 2\sqrt{\frac{\bar{P}_i(x'|x, a) \ln\left(\frac{T|X||A|}{\delta}\right)}{\max\{1, N_i(x, a) - 1\}}} + \frac{14 \ln\left(\frac{T|X||A|}{\delta}\right)}{3 \max\{1, N_i(x, a) - 1\}}.$$

Viewing this as a quadratic inequality of  $\sqrt{\bar{P}_i(x'|x, a)}$  and solving for  $\bar{P}_i(x'|x, a)$  prove the lemma. □

The next one is a standard Bernstein-type concentration inequality for martingale. We use the version from (Beygelzimer et al., 2011, Theorem 1).

**Lemma 9.** *Let  $Y_1, \dots, Y_T$  be a martingale difference sequence with respect to a filtration  $\mathcal{F}_1, \dots, \mathcal{F}_T$ . Assume  $Y_t \leq R$  a.s. for all  $i$ . Then for any  $\delta \in (0, 1)$  and  $\lambda \in [0, 1/R]$ , with probability at least  $1 - \delta$ , we have*

$$\sum_{t=1}^T Y_t \leq \lambda \sum_{t=1}^T \mathbb{E}_t[Y_t^2] + \frac{\ln(1/\delta)}{\lambda}.$$

The last one is based on similar ideas used for proving many other optimistic algorithms.

**Lemma 10.** *With probability at least  $1 - 2\delta$ , we have for all  $k = 0, \dots, L - 1$ ,*

$$\sum_{t=1}^T \sum_{x \in X_k, a \in A} \frac{q_t(x, a)}{\max\{1, N_{i_t}(x, a)\}} = \mathcal{O}(|X_k||A| \ln T + \ln(L/\delta)) \quad (13)$$

and

$$\sum_{t=1}^T \sum_{x \in X_k, a \in A} \frac{q_t(x, a)}{\sqrt{\max\{1, N_{i_t}(x, a)\}}} = \mathcal{O}\left(\sqrt{|X_k||A|T} + |X_k||A| \ln T + \ln(L/\delta)\right). \quad (14)$$

*Proof.* Let  $\mathbb{I}_t(x, a)$  be the indicator of whether the pair  $(x, a)$  is visited in episode  $t$  so that  $\mathbb{E}_t[\mathbb{I}_t(x, a)] = q_t(x, a)$ . We decompose the first quantity as

$$\sum_{t=1}^T \sum_{x \in X_k, a \in A} \frac{q_t(x, a)}{\max\{1, N_{i_t}(x, a)\}} = \sum_{t=1}^T \sum_{x \in X_k, a \in A} \frac{\mathbb{I}_t(x, a)}{\max\{1, N_{i_t}(x, a)\}} + \sum_{t=1}^T \sum_{x \in X_k, a \in A} \frac{q_t(x, a) - \mathbb{I}_t(x, a)}{\max\{1, N_{i_t}(x, a)\}}.$$

The first term can be bounded as

$$\sum_{x \in X_k, a \in A} \sum_{t=1}^T \frac{\mathbb{I}_t(x, a)}{\max\{1, N_{i_t}(x, a)\}} = \sum_{x \in X_k, a \in A} \mathcal{O}(\ln T) = \mathcal{O}(|X_k||A| \ln T).$$

To bound the second term, we apply Lemma 9 with  $Y_t = \sum_{x \in X_k, a \in A} \frac{q_t(x, a) - \mathbb{I}_t(x, a)}{\max\{1, N_{i_t}(x, a)\}} \leq 1$ ,  $\lambda = 1/2$ , and the fact

$$\begin{aligned} \mathbb{E}_t[Y_t^2] &\leq \mathbb{E}_t \left[ \left( \sum_{x \in X_k, a \in A} \frac{\mathbb{I}_t(x, a)}{\max\{1, N_{i_t}(x, a)\}} \right)^2 \right] \\ &= \mathbb{E}_t \left[ \sum_{x \in X_k, a \in A} \frac{\mathbb{I}_t(x, a)}{\max\{1, N_{i_t}^2(x, a)\}} \right] \quad (\mathbb{I}_t(x, a)\mathbb{I}_t(x', a') = 0 \text{ for } x \neq x' \in X_k) \\ &\leq \sum_{x \in X_k, a \in A} \frac{q_t(x, a)}{\max\{1, N_{i_t}(x, a)\}}, \end{aligned}$$

which gives with probability at least  $1 - \delta/L$ ,

$$\sum_{t=1}^T \sum_{x \in X_k, a \in A} \frac{q_t(x, a) - \mathbb{I}_t(x, a)}{\max\{1, N_{i_t}(x, a)\}} \leq \frac{1}{2} \sum_{t=1}^T \sum_{x \in X_k, a \in A} \frac{q_t(x, a)}{\max\{1, N_{i_t}(x, a)\}} + 2 \ln \left( \frac{L}{\delta} \right).$$

Combining these two bounds, rearranging, and applying a union bound over  $k$  prove Eq. (13).

Similarly, we decompose the second quantity as

$$\sum_{t=1}^T \sum_{x \in X_k, a \in A} \frac{q_t(x, a)}{\sqrt{\max\{1, N_{i_t}(x, a)\}}} = \sum_{t=1}^T \sum_{x \in X_k, a \in A} \frac{\mathbb{I}_t(x, a)}{\sqrt{\max\{1, N_{i_t}(x, a)\}}} + \sum_{t=1}^T \sum_{x \in X_k, a \in A} \frac{q_t(x, a) - \mathbb{I}_t(x, a)}{\sqrt{\max\{1, N_{i_t}(x, a)\}}}.$$

The first term is bounded by

$$\begin{aligned} \sum_{x \in X_k, a \in A} \sum_{t=1}^T \frac{\mathbb{I}_t(x, a)}{\sqrt{\max\{1, N_{i_t}(x, a)\}}} &= \mathcal{O} \left( \sum_{x \in X_k, a \in A} \sqrt{N_{i_T}(x, a)} \right) \\ &\leq \mathcal{O} \left( \sqrt{|X_k||A| \sum_{x \in X_k, a \in A} N_{i_T}(x, a)} \right) = \mathcal{O} \left( \sqrt{|X_k||A|T} \right), \end{aligned}$$

where the second line uses the Cauchy-Schwarz inequality and the fact  $\sum_{x \in X_k, a \in A} N_{i_T}(x, a) \leq T$ . To bound the second term, we again apply Lemma 9 with  $Y_t = \sum_{x \in X_k, a \in A} \frac{q_t(x, a) - \mathbb{I}_t(x, a)}{\sqrt{\max\{1, N_{i_t}(x, a)\}}} \leq 1$ ,  $\lambda = 1$ , and the fact

$$\mathbb{E}_t[Y_t^2] \leq \mathbb{E}_t \left[ \left( \sum_{x \in X_k, a \in A} \frac{\mathbb{I}_t(x, a)}{\sqrt{\max\{1, N_{i_t}(x, a)\}}} \right)^2 \right] = \sum_{x \in X_k, a \in A} \frac{q_t(x, a)}{\max\{1, N_{i_t}(x, a)\}},$$

which shows with probability at least  $1 - \delta/L$ ,

$$\sum_{t=1}^T \sum_{x \in X_k, a \in A} \frac{q_t(x, a) - \mathbb{I}_t(x, a)}{\sqrt{\max\{1, N_{i_t}(x, a)\}}} \leq \sum_{t=1}^T \sum_{x \in X_k, a \in A} \frac{q_t(x, a)}{\max\{1, N_{i_t}(x, a)\}} + \ln \left( \frac{L}{\delta} \right).$$

Combining Eq. (13) and a union bound proves Eq. (14).  $\square$

## B.2. Proof of the Key Lemma

We are now ready to prove Lemma 4, the key lemma of our analysis which requires using our new confidence set.

*Proof of Lemma 4.* To simplify notation, let  $q_t^x = q^{P_t^x, \pi_t}$ . Note that for any occupancy measure  $q$ , by definition we have for any  $(x, a)$  pair,

$$q(x, a) = \pi^q(x|a) \sum_{\{x_k \in X_k, a_k \in A\}_{k=0}^{k(x)-1}} \prod_{h=0}^{k(x)-1} \pi^q(a_h|x_h) \prod_{h=0}^{k(x)-1} P^q(x_{h+1}|x_h, a_h).$$

where we define  $x_{k(x)} = x$  for convenience. Therefore, we have

$$|q_t^x(x, a) - q_t(x, a)| = \pi_t(x|a) \sum_{\{x_k, a_k\}_{k=0}^{k(x)-1}} \prod_{h=0}^{k(x)-1} \pi_t(a_h|x_h) \left( \prod_{h=0}^{k(x)-1} P_t^x(x_{h+1}|x_h, a_h) - \prod_{h=0}^{k(x)-1} P(x_{h+1}|x_h, a_h) \right).$$

By adding and subtracting  $k(x) - 1$  terms we rewrite the last term in the parentheses as

$$\begin{aligned} & \prod_{h=0}^{k(x)-1} P_t^x(x_{h+1}|x_h, a_h) - \prod_{h=0}^{k(x)-1} P(x_{h+1}|x_h, a_h) \\ &= \prod_{h=0}^{k(x)-1} P_t^x(x_{h+1}|x_h, a_h) - \prod_{h=0}^{k(x)-1} P(x_{h+1}|x_h, a_h) \pm \sum_{m=1}^{k(x)-1} \prod_{h=0}^{m-1} P(x_{h+1}|x_h, a_h) \prod_{h=m}^{k(x)-1} P_t^x(x_{h+1}|x_h, a_h) \\ &= \sum_{m=0}^{k(x)-1} (P_t^x(x_{m+1}|x_m, a_m) - P(x_{m+1}|x_m, a_m)) \prod_{h=0}^{m-1} P(x_{h+1}|x_h, a_h) \prod_{h=m+1}^{k(x)-1} P_t^x(x_{h+1}|x_h, a_h), \end{aligned}$$

which, by Lemma 8, is bounded by

$$\sum_{m=0}^{k(x)-1} \epsilon_{i_t}^*(x_{m+1}|x_m, a_m) \prod_{h=0}^{m-1} P(x_{h+1}|x_h, a_h) \prod_{h=m+1}^{k(x)-1} P_t^x(x_{h+1}|x_h, a_h).$$

We have thus shown

$$\begin{aligned} & |q_t^x(x, a) - q_t(x, a)| \\ & \leq \pi_t(x|a) \sum_{\{x_k, a_k\}_{k=0}^{k(x)-1}} \prod_{h=0}^{k(x)-1} \pi_t(a_h|x_h) \sum_{m=0}^{k(x)-1} \epsilon_{i_t}^*(x_{m+1}|x_m, a_m) \prod_{h=0}^{m-1} P(x_{h+1}|x_h, a_h) \prod_{h=m+1}^{k(x)-1} P_t^x(x_{h+1}|x_h, a_h) \end{aligned}$$

$$\begin{aligned}
 &= \sum_{m=0}^{k(x)-1} \sum_{\{x_k, a_k\}_{k=0}^{k(x)-1}} \epsilon_{i_t}^*(x_{m+1}|x_m, a_m) \left( \pi_t(a_m|x_m) \prod_{h=0}^{m-1} \pi_t(a_h|x_h) P(x_{h+1}|x_h, a_h) \right) \\
 &\quad \cdot \left( \pi_t(x|a) \prod_{h=m+1}^{k(x)-1} \pi_t(a_h|x_h) P_t^x(x_{h+1}|x_h, a_h) \right) \\
 &= \sum_{m=0}^{k(x)-1} \sum_{x_m, a_m, x_{m+1}} \epsilon_{i_t}^*(x_{m+1}|x_m, a_m) \left( \sum_{\{x_k, a_k\}_{k=0}^{m-1}} \pi_t(a_m|x_m) \prod_{h=0}^{m-1} \pi_t(a_h|x_h) P(x_{h+1}|x_h, a_h) \right) \\
 &\quad \cdot \left( \sum_{a_{m+1}} \sum_{\{x_k, a_k\}_{k=m+2}^{k(x)-1}} \pi_t(x|a) \prod_{h=m+1}^{k(x)-1} \pi_t(a_h|x_h) P_t^x(x_{h+1}|x_h, a_h) \right) \\
 &= \sum_{m=0}^{k(x)-1} \sum_{x_m, a_m, x_{m+1}} \epsilon_{i_t}^*(x_{m+1}|x_m, a_m) q_t(x_m, a_m) q_t^x(x, a|x_{m+1}), \tag{15}
 \end{aligned}$$

where we use  $q_t^x(x, a|x_{m+1})$  to denote the probability of encountering pair  $(x, a)$  given that  $x_{m+1}$  was visited in layer  $m+1$ , under policy  $\pi_t$  and transition  $P_t^x$ . By the exact same reasoning, we also have

$$\begin{aligned}
 |q_t^x(x, a|x_{m+1}) - q_t(x, a|x_{m+1})| &\leq \sum_{h=m+1}^{k(x)-1} \sum_{x'_h, a'_h, x'_{h+1}} \epsilon_{i_t}^*(x'_{h+1}|x'_h, a'_h) q_t(x'_h, a'_h|x_{m+1}) q_t^x(x, a|x'_{h+1}) \\
 &\leq \pi_t(a|x) \sum_{h=m+1}^{k(x)-1} \sum_{x'_h, a'_h, x'_{h+1}} \epsilon_{i_t}^*(x'_{h+1}|x'_h, a'_h) q_t(x'_h, a'_h|x_{m+1}) \tag{16}
 \end{aligned}$$

Combining Eq. (15) and Eq. (16), summing over all  $t$  and  $(x, a)$ , and using the shorthands  $w_m = (x_m, a_m, x_{m+1})$  and  $w'_h = (x'_h, a'_h, x'_{h+1})$ , we have derived

$$\begin{aligned}
 &\sum_{t=1}^T \sum_{x \in X, a \in A} |q_t^x(x, a) - q_t(x, a)| \\
 &\leq \sum_{t, x, a} \sum_{m=0}^{k(x)-1} \sum_{w_m} \epsilon_{i_t}^*(x_{m+1}|x_m, a_m) q_t(x_m, a_m) q_t(x, a|x_{m+1}) \\
 &\quad + \sum_{t, x, a} \sum_{m=0}^{k(x)-1} \sum_{w_m} \epsilon_{i_t}^*(x_{m+1}|x_m, a_m) q_t(x_m, a_m) \left( \pi_t(a|x) \sum_{h=m+1}^{k(x)-1} \sum_{w'_h} \epsilon_{i_t}^*(x'_{h+1}|x'_h, a'_h) q_t(x'_h, a'_h|x_{m+1}) \right) \\
 &= \sum_t \sum_{k < L} \sum_{m=0}^{k-1} \sum_{w_m} \epsilon_{i_t}^*(x_{m+1}|x_m, a_m) q_t(x_m, a_m) \sum_{x \in X_k, a \in A} q_t(x, a|x_{m+1}) \\
 &\quad + \sum_t \sum_{k < L} \sum_{m=0}^{k-1} \sum_{w_m} \sum_{h=m+1}^{k-1} \sum_{w'_h} \epsilon_{i_t}^*(x_{m+1}|x_m, a_m) q_t(x_m, a_m) \epsilon_{i_t}^*(x'_{h+1}|x'_h, a'_h) q_t(x'_h, a'_h|x_{m+1}) \left( \sum_{x \in X_k, a \in A} \pi_t(a|x) \right) \\
 &= \sum_{0 \leq m < k < L} \sum_{t, w_m} \epsilon_{i_t}^*(x_{m+1}|x_m, a_m) q_t(x_m, a_m) \\
 &\quad + \sum_{0 \leq m < h < k < L} |X_k| \sum_{t, w_m, w'_h} \epsilon_{i_t}^*(x_{m+1}|x_m, a_m) q_t(x_m, a_m) \epsilon_{i_t}^*(x'_{h+1}|x'_h, a'_h) q_t(x'_h, a'_h|x_{m+1}) \\
 &\leq \underbrace{\sum_{0 \leq m < k < L} \sum_{t, w_m} \epsilon_{i_t}^*(x_{m+1}|x_m, a_m) q_t(x_m, a_m)}_{\triangleq B_1}
 \end{aligned}$$

$$+ |X| \underbrace{\sum_{0 \leq m < h < L} \sum_{t, w_m, w'_h} \epsilon_{i_t}^*(x_{m+1}|x_m, a_m) q_t(x_m, a_m) \epsilon_{i_t}^*(x'_{h+1}|x'_h, a'_h) q_t(x'_h, a'_h|x_{m+1})}_{\triangleq B_2}.$$

It remains to bound  $B_1$  and  $B_2$  using the definition of  $\epsilon_{i_t}^*$ . For  $B_1$ , we have

$$\begin{aligned} B_1 &= \mathcal{O} \left( \sum_{0 \leq m < k < L} \sum_{t, w_m} q_t(x_m, a_m) \sqrt{\frac{P(x_{m+1}|x_m, a_m) \ln \left( \frac{T|X||A|}{\delta} \right)}{\max\{1, N_{i_t}(x_m, a_m)\}}} + \frac{q_t(x_m, a_m) \ln \left( \frac{T|X||A|}{\delta} \right)}{\max\{1, N_{i_t}(x_m, a_m)\}} \right) \\ &\leq \mathcal{O} \left( \sum_{0 \leq m < k < L} \sum_{t, x_m, a_m} q_t(x_m, a_m) \sqrt{\frac{|X_{m+1}| \ln \left( \frac{T|X||A|}{\delta} \right)}{\max\{1, N_{i_t}(x_m, a_m)\}}} + \frac{q_t(x_m, a_m) \ln \left( \frac{T|X||A|}{\delta} \right)}{\max\{1, N_{i_t}(x_m, a_m)\}} \right) \\ &\leq \mathcal{O} \left( \sum_{0 \leq m < k < L} \sqrt{|X_m||X_{m+1}||A|T \ln \left( \frac{T|X||A|}{\delta} \right)} \right) \\ &\leq \mathcal{O} \left( \sum_{0 \leq m < k < L} (|X_m| + |X_{m+1}|) \sqrt{|A|T \ln \left( \frac{T|X||A|}{\delta} \right)} \right) \\ &= \mathcal{O} \left( L|X| \sqrt{|A|T \ln \left( \frac{T|X||A|}{\delta} \right)} \right), \end{aligned}$$

where the second line uses the Cauchy-Schwarz inequality, the third line uses Lemma 10, and the fourth line uses the AM-GM inequality.

For  $B_2$ , plugging the definition of  $\epsilon_{i_t}^*$  and using trivial bounds (that is,  $\epsilon_{i_t}^*$  and  $q_t$  are both at most 1 regardless of the arguments), we obtain the following three terms (ignoring constants)

$$\begin{aligned} &\sum_{0 \leq m < h < L} \sum_{t, w_m, w'_h} \sqrt{\frac{P(x_{m+1}|x_m, a_m) \ln \left( \frac{T|X||A|}{\delta} \right)}{\max\{1, N_{i_t}(x_m, a_m)\}}} q_t(x_m, a_m) \sqrt{\frac{P(x'_{h+1}|x'_h, a'_h) \ln \left( \frac{T|X||A|}{\delta} \right)}{\max\{1, N_{i_t}(x'_h, a'_h)\}}} q_t(x'_h, a'_h|x_{m+1}) \\ &+ \sum_{0 \leq m < h < L} \sum_{t, w_m, w'_h} \frac{q_t(x_m, a_m) \ln \left( \frac{T|X||A|}{\delta} \right)}{\max\{1, N_{i_t}(x_m, a_m)\}} + \sum_{0 \leq m < h < L} \sum_{t, w_m, w'_h} \frac{q_t(x'_h, a'_h) \ln \left( \frac{T|X||A|}{\delta} \right)}{\max\{1, N_{i_t}(x'_h, a'_h)\}}. \end{aligned}$$

The last two terms are both of order  $\mathcal{O}(\ln T)$  by Lemma 10 (ignoring dependence on other parameters), while the first term can be written as  $\ln \left( \frac{T|X||A|}{\delta} \right)$  multiplied by the following:

$$\begin{aligned} &\sum_{0 \leq m < h < L} \sum_{t, w_m, w'_h} \sqrt{\frac{q_t(x_m, a_m) P(x'_{h+1}|x'_h, a'_h) q_t(x'_h, a'_h|x_{m+1})}{\max\{1, N_{i_t}(x_m, a_m)\}}} \sqrt{\frac{q_t(x_m, a_m) P(x_{m+1}|x_m, a_m) q_t(x'_h, a'_h|x_{m+1})}{\max\{1, N_{i_t}(x'_h, a'_h)\}}} \\ &\leq \sum_{0 \leq m < h < L} \sqrt{\sum_{t, w_m, w'_h} \frac{q_t(x_m, a_m) P(x'_{h+1}|x'_h, a'_h) q_t(x'_h, a'_h|x_{m+1})}{\max\{1, N_{i_t}(x_m, a_m)\}}} \sqrt{\sum_{t, w_m, w'_h} \frac{q_t(x_m, a_m) P(x_{m+1}|x_m, a_m) q_t(x'_h, a'_h|x_{m+1})}{\max\{1, N_{i_t}(x'_h, a'_h)\}}} \\ &= \sum_{0 \leq m < h < L} \sqrt{|X_{m+1}| \sum_{t, x_m, a_m} \frac{q_t(x_m, a_m)}{\max\{1, N_{i_t}(x_m, a_m)\}}} \sqrt{|X_{h+1}| \sum_{t, x'_h, a'_h} \frac{q_t(x'_h, a'_h)}{\max\{1, N_{i_t}(x'_h, a'_h)\}}} \\ &= \mathcal{O} \left( |A| \ln \left( \frac{T|X||A|}{\delta} \right) \sum_{0 \leq m < h < L} \sqrt{|X_m||X_{m+1}||X_h||X_{h+1}|} \right) = \mathcal{O} \left( L^2 |X|^2 |A| \ln \left( \frac{T|X||A|}{\delta} \right) \right), \end{aligned}$$

where the second line uses the Cauchy-Schwarz inequality and the last line uses Lemma 10 again. This shows that the entire term  $B_2$  is of order  $\mathcal{O}(\ln T)$ . Finally, realizing that we have conditioned on the events stated in Lemmas 8 and 10, which happen with probability at least  $1 - 6\delta$ , finishes the proof.  $\square$



### B.3. Bounding REG and BIAS<sub>2</sub>

In this section, we complete the proof of our main theorem by bounding the terms REG and BIAS<sub>2</sub>. We first state the following useful concentration lemma which is a variant of (Neu, 2015, Lemma 1) and is the key for analyzing the implicit exploration effect introduced by  $\gamma$ . The proof is based on the same idea of the proof for (Neu, 2015, Lemma 1).

**Lemma 11.** *For any sequence of functions  $\alpha_1, \dots, \alpha_T$  such that  $\alpha_t \in [0, 2\gamma]^{X \times A}$  is  $\mathcal{F}_t$ -measurable for all  $t$ , we have with probability at least  $1 - \delta$ ,*

$$\sum_{t=1}^T \sum_{x,a} \alpha_t(x, a) \left( \widehat{\ell}_t(x, a) - \frac{q_t(x, a)}{u_t(x, a)} \ell_t(x, a) \right) \leq L \ln \frac{L}{\delta}.$$

*Proof.* Fix any  $t$ . For simplicity, let  $\beta = 2\gamma$  and  $\mathbb{I}_{t,x,a}$  be a shorthand of  $\mathbb{I}\{x_{k(x)} = x, a_{k(x)} = a\}$ . Then for any state-action pair  $(x, a)$ , we have

$$\widehat{\ell}_t(x, a) = \frac{\ell_t(x, a)\mathbb{I}_{t,x,a}}{u_t(x, a) + \gamma} \leq \frac{\ell_t(x, a)\mathbb{I}_{t,x,a}}{u_t(x, a) + \gamma\ell_t(x, a)} = \frac{\mathbb{I}_{t,x,a}}{\beta} \cdot \frac{2\gamma\ell_t(x, a)/u_t(x, a)}{1 + \gamma\ell_t(x, a)/u_t(x, a)} \leq \frac{1}{\beta} \ln \left( 1 + \frac{\beta\ell_t(x, a)\mathbb{I}_{t,x,a}}{u_t(x, a)} \right), \quad (17)$$

where the last step uses the fact  $\frac{z}{1+z/2} \leq \ln(1+z)$  for all  $z \geq 0$ . For each layer  $k < L$ , further define

$$\widehat{S}_{t,k} = \sum_{x \in X_k, a \in A} \alpha_t(x, a) \widehat{\ell}_t(x, a) \quad \text{and} \quad S_{t,k} = \sum_{x \in X_k, a \in A} \alpha_t(x, a) \frac{q_t(x, a)}{u_t(x, a)} \ell_t(x, a).$$

The following calculation shows  $\mathbb{E}_t \left[ \exp(\widehat{S}_{t,k}) \right] \leq \exp(S_{t,k})$ :

$$\begin{aligned} \mathbb{E}_t \left[ \exp(\widehat{S}_{t,k}) \right] &\leq \mathbb{E}_t \left[ \exp \left( \sum_{x \in X_k, a \in A} \frac{\alpha_t(x, a)}{\beta} \ln \left( 1 + \frac{\beta\ell_t(x, a)\mathbb{I}_{t,x,a}}{u_t(x, a)} \right) \right) \right] && \text{(by Eq. (17))} \\ &\leq \mathbb{E}_t \left[ \prod_{x \in X_k, a \in A} \left( 1 + \frac{\alpha_t(x, a)\ell_t(x, a)\mathbb{I}_{t,x,a}}{u_t(x, a)} \right) \right] \\ &= \mathbb{E}_t \left[ 1 + \sum_{x \in X_k, a \in A} \frac{\alpha_t(x, a)\ell_t(x, a)\mathbb{I}_{t,x,a}}{u_t(x, a)} \right] \\ &= 1 + S_{t,k} \leq \exp(S_{t,k}). \end{aligned}$$

Here, the second inequality is due to the fact  $z_1 \ln(1+z_2) \leq \ln(1+z_1z_2)$  for all  $z_2 \geq -1$  and  $z_1 \in [0, 1]$ , and we apply it with  $z_1 = \frac{\alpha_t(x, a)}{\beta}$  which is in  $[0, 1]$  by the condition  $\alpha_t(x, a) \in [0, 2\gamma]$ ; the first equality holds since  $\mathbb{I}_{t,x,a}\mathbb{I}_{t,x',a'} = 0$  for any  $x \neq x'$  or  $a \neq a'$  (as only one state-action pair can be visited in each layer for an episode). Next we apply Markov inequality and show

$$\begin{aligned} \Pr \left[ \sum_{t=1}^T (\widehat{S}_{t,k} - S_{t,k}) > \ln \left( \frac{L}{\delta} \right) \right] &\leq \frac{\delta}{L} \cdot \mathbb{E} \left[ \exp \left( \sum_{t=1}^T (\widehat{S}_{t,k} - S_{t,k}) \right) \right] \\ &= \frac{\delta}{L} \cdot \mathbb{E} \left[ \exp \left( \sum_{t=1}^{T-1} (\widehat{S}_{t,k} - S_{t,k}) \right) \mathbb{E}_T \left[ \exp(\widehat{S}_{T,k} - S_{T,k}) \right] \right] \\ &\leq \frac{\delta}{L} \cdot \mathbb{E} \left[ \exp \left( \sum_{t=1}^{T-1} (\widehat{S}_{t,k} - S_{t,k}) \right) \right] \\ &\leq \dots \leq \frac{\delta}{L}. \end{aligned} \quad (18)$$

Finally, applying a union bound over  $k = 0, \dots, L-1$  shows with probability at least  $1 - \delta$ ,

$$\sum_{t=1}^T \sum_{x,a} \alpha_t(x, a) \left( \widehat{\ell}_t(x, a) - \frac{q_t(x, a)}{u_t(x, a)} \ell_t(x, a) \right) = \sum_{k=0}^{L-1} \sum_{t=1}^T (\widehat{S}_{t,k} - S_{t,k}) \leq L \ln \left( \frac{L}{\delta} \right),$$

which completes the proof.  $\square$

**Bounding REG.** To bound  $\text{REG} = \sum_{t=1}^T \langle \hat{q}_t - q^*, \hat{\ell}_t \rangle$ , note that under the event of Lemma 2,  $q^* \in \cap_i \Delta(\mathcal{P}_i)$ , and thus REG is controlled by the standard regret guarantee of OMD. Specifically, we prove the following lemma.

**Lemma 12.** *With probability at least  $1 - 5\delta$ , UOB-REPS ensures  $\text{REG} = \mathcal{O}\left(\frac{L \ln(|X||A|)}{\eta} + \eta |X||A|T + \frac{\eta L \ln(L/\delta)}{\gamma}\right)$ .*

*Proof.* By standard analysis (see Lemma 13 after this proof), OMD with KL-divergence ensures for any  $q \in \cap_i \Delta(\mathcal{P}_i)$ ,

$$\sum_{t=1}^T \langle \hat{q}_t - q, \hat{\ell}_t \rangle \leq \frac{L \ln(|X|^2|A|)}{\eta} + \eta \sum_{t,x,a} \hat{q}_t(x,a) \hat{\ell}_t(x,a)^2.$$

Further note that  $\hat{q}_t(x,a) \hat{\ell}_t(x,a)^2$  is bounded by

$$\frac{\hat{q}_t(x,a)}{u_t(x,a) + \gamma} \hat{\ell}_t(x,a) \leq \hat{\ell}_t(x,a)$$

by the fact  $\hat{q}_t(x,a) \leq u_t(x,a)$ . Applying Lemma 11 with  $\alpha_t(x,a) = 2\gamma$  then shows with probability at least  $1 - \delta$ ,

$$\sum_{t,x,a} \hat{q}_t(x,a) \hat{\ell}_t(x,a)^2 \leq \sum_{t,x,a} \frac{q_t(x,a)}{u_t(x,a)} \ell_t(x,a) + \frac{L \ln \frac{L}{\delta}}{2\gamma}.$$

Finally, note that under the event of Lemma 2, we have  $q^* \in \cap_i \Delta(\mathcal{P}_i)$ ,  $q_t(x,a) \leq u_t(x,a)$ , and thus  $\frac{q_t(x,a)}{u_t(x,a)} \ell_t(x,a) \leq 1$ . Applying a union bound then finishes the proof.  $\square$

**Lemma 13.** *The OMD update with  $\hat{q}_1(x,a,x') = \frac{1}{|X_k||A||X_{k+1}|}$  for all  $k < L$  and  $(x,a,x') \in X_k \times A \times X_{k+1}$ , and*

$$\hat{q}_{t+1} = \underset{q \in \Delta(\mathcal{P}_{i_t})}{\operatorname{argmin}} \eta \langle q, \hat{\ell}_t \rangle + D(q \| \hat{q}_t)$$

where  $D(q \| q') = \sum_{x,a,x'} q(x,a,x') \ln \frac{q(x,a,x')}{q'(x,a,x')} - \sum_{x,a,x'} (q(x,a,x') - q'(x,a,x'))$  ensures

$$\sum_{t=1}^T \langle \hat{q}_t - q, \hat{\ell}_t \rangle \leq \frac{L \ln(|X|^2|A|)}{\eta} + \eta \sum_{t,x,a} \hat{q}_t(x,a) \hat{\ell}_t(x,a)^2$$

for any  $q \in \cap_i \Delta(\mathcal{P}_i)$ , as long as  $\hat{\ell}_t(x,a) \geq 0$  for all  $t, x, a$ .

*Proof.* Define  $\tilde{q}_{t+1}$  such that

$$\tilde{q}_{t+1}(x,a,x') = \hat{q}_t(x,a,x') \exp\left(-\eta \hat{\ell}_t(x,a)\right).$$

It is straightforward to verify  $\hat{q}_{t+1} = \operatorname{argmin}_{q \in \Delta(\mathcal{P}_{i_t})} D(q \| \tilde{q}_{t+1})$  and also

$$\eta \langle \hat{q}_t - q, \hat{\ell}_t \rangle = D(q \| \hat{q}_t) - D(q \| \tilde{q}_{t+1}) + D(\hat{q}_t \| \tilde{q}_{t+1}).$$

By the condition  $q \in \Delta(\mathcal{P}_{i_t})$  and the generalized Pythagorean theorem we also have  $D(q \| \hat{q}_{t+1}) \leq D(q \| \tilde{q}_{t+1})$  and thus

$$\begin{aligned} \eta \sum_{t=1}^T \langle \hat{q}_t - q, \hat{\ell}_t \rangle &\leq \sum_{t=1}^T (D(q \| \hat{q}_t) - D(q \| \hat{q}_{t+1}) + D(\hat{q}_t \| \tilde{q}_{t+1})) \\ &= D(q \| \hat{q}_1) - D(q \| \hat{q}_{T+1}) + \sum_{t=1}^T D(\hat{q}_t \| \tilde{q}_{t+1}). \end{aligned}$$

The first two terms can be rewritten as

$$\sum_{k=0}^{L-1} \sum_{x \in X_k} \sum_{a \in A} \sum_{x' \in X_{k+1}} q(x,a,x') \ln \frac{\hat{q}_{T+1}(x,a,x')}{\hat{q}_1(x,a,x')}$$

$$\begin{aligned}
 &\leq \sum_{k=0}^{L-1} \sum_{x \in X_k} \sum_{a \in A} \sum_{x' \in X_{k+1}} q(x, a, x') \ln(|X_k||A||X_{k+1}|) && \text{(by definition of } \widehat{q}_1) \\
 &= \sum_{k=0}^{L-1} \ln(|X_k||A||X_{k+1}|) \leq L \ln(|X|^2|A|).
 \end{aligned}$$

It remains to bound the term  $D(\widehat{q}_t \parallel \tilde{q}_{t+1})$ :

$$\begin{aligned}
 D(\widehat{q}_t \parallel \tilde{q}_{t+1}) &= \sum_{k=0}^{L-1} \sum_{x \in X_k} \sum_{a \in A} \sum_{x' \in X_{k+1}} \left( \eta \widehat{q}_t(x, a, x') \widehat{\ell}_t(x, a) - \widehat{q}_t(x, a, x') + \widehat{q}_t(x, a, x') \exp\left(-\eta \widehat{\ell}_t(x, a)\right) \right) \\
 &\leq \eta^2 \sum_{k=0}^{L-1} \sum_{x \in X_k} \sum_{a \in A} \sum_{x' \in X_{k+1}} \widehat{q}_t(x, a, x') \widehat{\ell}_t(x, a)^2 \\
 &= \eta^2 \sum_{x \in X, a \in A} \widehat{q}_t(x, a) \widehat{\ell}_t(x, a)^2
 \end{aligned}$$

where the inequality is due to the fact  $e^{-z} \leq 1 - z + z^2$  for all  $z \geq 0$ . This finishes the proof.  $\square$

**Bounding BIAS<sub>2</sub>.** It remains to bound the term  $\text{BIAS}_2 = \sum_{t=1}^T \langle q^*, \widehat{\ell}_t - \ell_t \rangle$ , which can be done via a direct application of Lemma 11.

**Lemma 14.** *With probability at least  $1 - 5\delta$ , UOB-REPS ensures  $\text{BIAS}_2 = \mathcal{O}\left(\frac{L \ln(|X||A|/\delta)}{\gamma}\right)$ .*

*Proof.* For each state-action pair  $(x, a)$ , we apply Eq. (18) in Lemma 11 with  $\alpha_t(x', a') = 2\gamma \mathbb{I}_{\{x'=x, a'=a\}}$ , which shows that with probability at least  $1 - \frac{\delta}{|X||A|}$ ,

$$\sum_{t=1}^T \left( \widehat{\ell}_t(x, a) - \frac{q_t(x, a)}{u_t(x, a)} \ell_t(x, a) \right) \leq \frac{1}{2\gamma} \ln \left( \frac{|X||A|}{\delta} \right).$$

Taking a union bound over all state-action pairs shows that with probability at least  $1 - \delta$ , we have for all occupancy measure  $q \in \Omega$ ,

$$\begin{aligned}
 \sum_{t=1}^T \langle q, \widehat{\ell}_t - \ell_t \rangle &\leq \sum_{t,x,a} q(x, a) \ell_t(x, a) \left( \frac{q_t(x, a)}{u_t(x, a)} - 1 \right) + \sum_{x,a} \frac{q(x, a) \ln \frac{|X||A|}{\delta}}{2\gamma} \\
 &= \sum_{t,x,a} q(x, a) \ell_t(x, a) \left( \frac{q_t(x, a)}{u_t(x, a)} - 1 \right) + \frac{L \ln \frac{|X||A|}{\delta}}{2\gamma}.
 \end{aligned}$$

Note again that under the event of Lemma 2, we have  $q_t(x, a) \leq u_t(x, a)$ , so the first term of the bound above is nonpositive. Applying a union bound and taking  $q = q^*$  finishes the proof.  $\square$
